# Supplementary material for: Dynamic patterns of gene expression and regulatory variation in the maize seed coat
Source: PubMed Central journal article supplement (PMC9903604; doi:10.1186/s12870-023-04078-1), 2023-02-07

Module-trait relationships

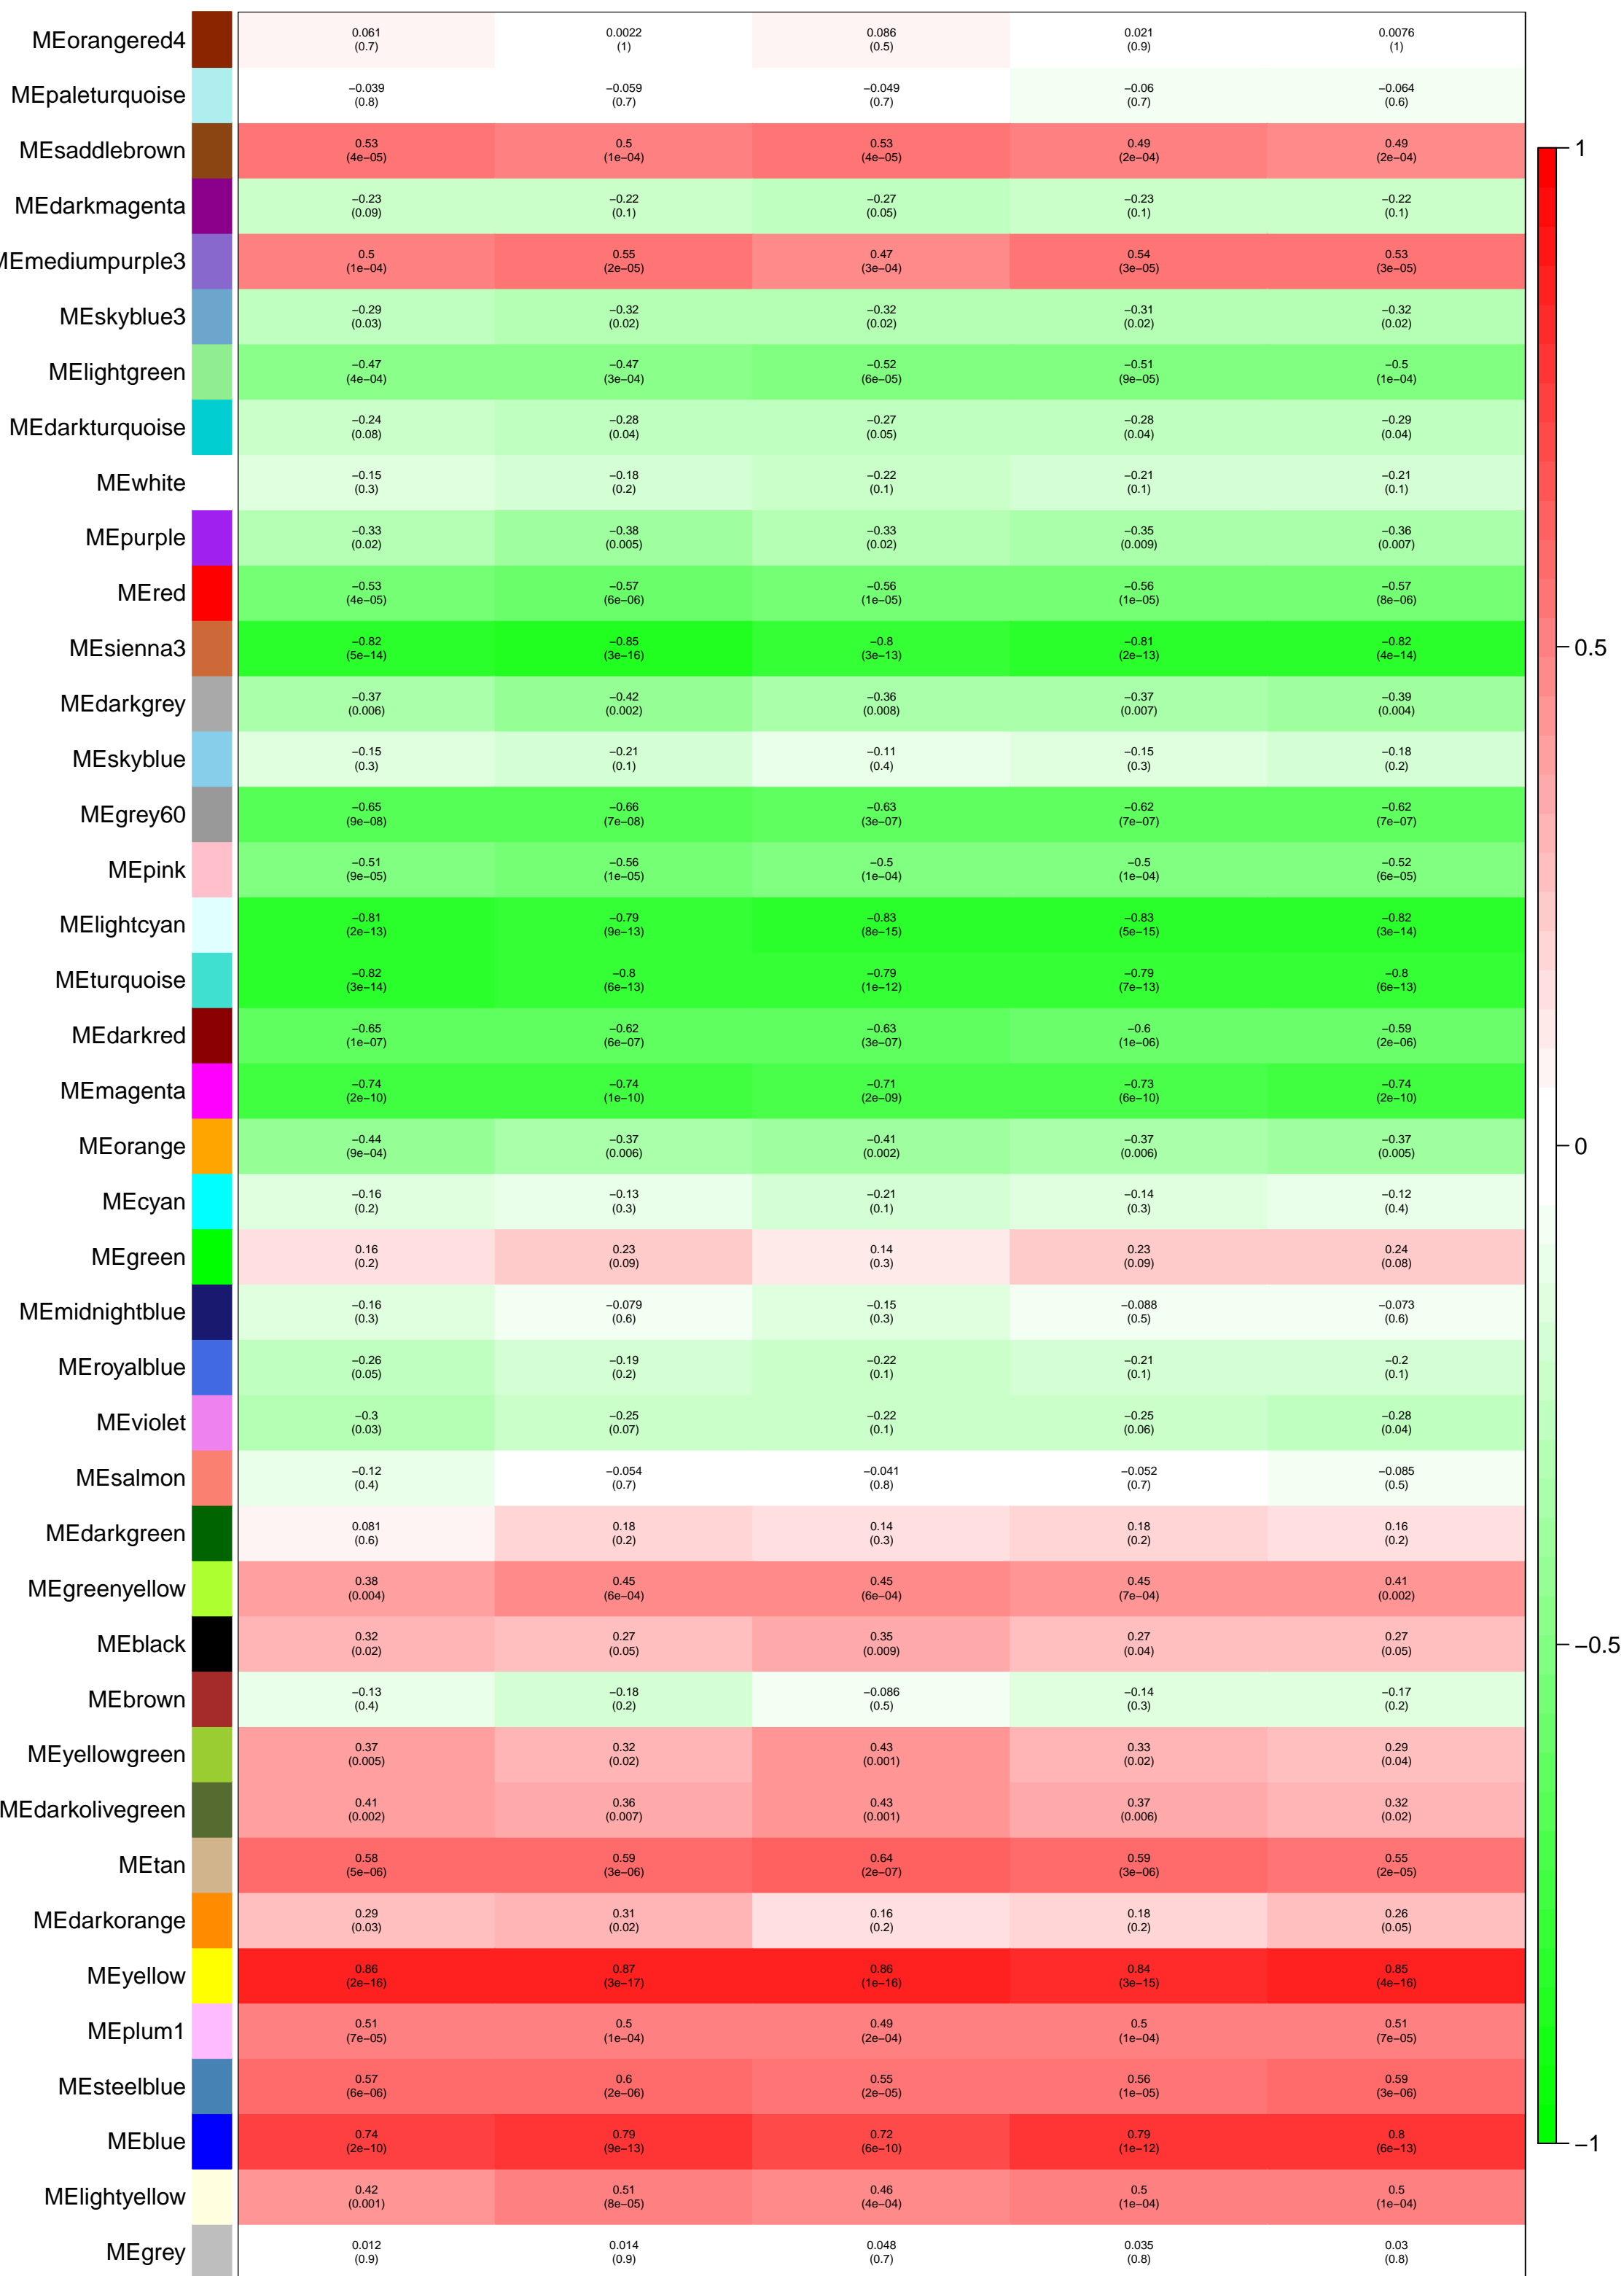

Supplement: 12870_2023_4078_MOESM2_ESM.pdf [file 12870_2023_4078_MOESM2_ESM.pdf]
